# Supplementary material
Source: PubMed Central journal article supplement (PMC1482623)
Supplement: pnas_0509645103_15.pdf [file pnas_0509645103_15.pdf]

**Table 2. Comparison of covalent bond rupture energies, distances, and forces for all covalent single bonds present in the experiment as well as for the Au-S bond.**

| Bond                                | Theoretical |       |                  | Experimental |                            | Theoretical (this work) |                             |                             |                    |
|-------------------------------------|-------------|-------|------------------|--------------|----------------------------|-------------------------|-----------------------------|-----------------------------|--------------------|
|                                     | C-O         | C-N   | C-S              | C-C          | Au-S <sup>†</sup><br>Au-Au | C-S<br>(TTF)            | C-S<br>(TTF <sup>2+</sup> ) | C-C<br>(TTF <sup>2+</sup> ) | Deslipping         |
| Bond energy, kcal·mol <sup>-1</sup> | 85-91       | 69-75 | 61               | 83-85        | 44                         | 55                      | 55                          | 55                          | 46                 |
| Rupture distance, Å                 | 1.43        | 1.38  | 1.82             | 1.54         | 2.4                        | 1.77                    | 1.68                        | 1.47                        | 8.61               |
| Rupture force, nN                   | 4.3         | 4.1   | 3.7 <sup>‡</sup> | 2-13         | 1.4                        | >1.0 <sup>‡</sup>       | >1.0 <sup>‡</sup>           | >1.0 <sup>‡</sup>           | 0.074 <sup>§</sup> |

<sup>†</sup>Room temperature experiments measuring the rupture of alkane-thiols on Au surfaces and of gold nanowires have both given rupture forces of  $1.4-1.5 \pm 0.3$  nN. It is unclear whether the Au-S bond is rupturing in experiment involving alkane-thiols on Au surfaces or whether Au-Au rupture is being observed.

<sup>‡</sup>The experimental loading rate for rupture of the C-S bond was not reported. Rupture values for the C-S bonds in TTF as well as C-S and C-C bonds in TTF<sup>2+</sup> are expected to require >1 nN given the similarities in bond energies and distances to experimental data for the C-S bond and the fact that all published accounts of covalent bond rupture indicate rupture forces much greater than 1 nN.

<sup>§</sup>The value of 0.074 nN is taken from the experimental AFM measurements presented in this work, which has been attributed to deslipping based on experimental and theoretical studies.
