# Supplementary material
Source: PubMed Central journal article supplement (PMC1482623)

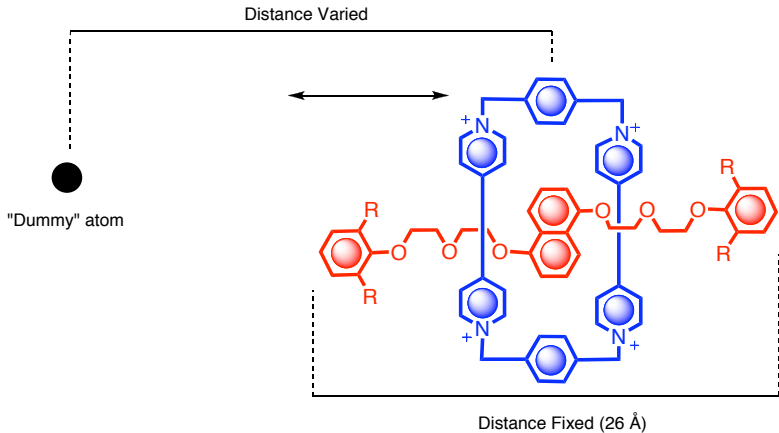

|           | R           |
|-----------|-------------|
| <b>S3</b> | Me,         |
| <b>S4</b> | Et          |
| <b>S5</b> | <i>i</i> Pr |

Supplement: pnas_0509645103_4.pdf [file pnas_0509645103_4.pdf]
